# Supplementary material for: Efficacy of radiofrequency ablation following transarterial chemoembolisation combined with sorafenib for intermediate stage recurrent hepatocellular carcinoma: a retrospective, multicentre, cohort study
Source: PubMed Central journal article supplement — eClinicalMedicine. 2023 Jan 20;56:101816. doi: 10.1016/j.eclinm.2022.101816 (PMC9871741; doi:10.1016/j.eclinm.2022.101816), 2023-01-20
Supplement: mmc1.pdf [file mmc1.pdf]

**Efficacy of radiofrequency ablation following transarterial  
chemoembolization combined with sorafenib for intermediate stage  
recurrent hepatocellular carcinoma: A retrospective, multicentre,  
cohort study**

Xiao-Hui Wang, MD<sup>1</sup>, Wen-Bin Duan, MD<sup>1</sup>, Wei Liang, MD<sup>2</sup>, Hui Li, MD<sup>3</sup>, Xiao-Yan Xie, MD,  
PhD<sup>4</sup>, Shao-Qiang Li, MD, PhD<sup>5</sup>, Min-Shan Chen, MD, PhD<sup>6</sup>, Ping Liang, MD, PhD<sup>7#</sup>, Xian-Hai  
Mao, MD, PhD<sup>1#</sup>, Qun-Fang Zhou, MD<sup>7#</sup>

<sup>1</sup>Department of Hepatobiliary Surgery, Hunan Provincial People's Hospital (The First Affiliated Hospital of Hunan Normal University) Changsha, Hunan province, 410005, China.

<sup>2</sup>Department of Minimally Invasive Interventional Radiology, the Second Affiliated Hospital of Guangzhou Medical University, Guangzhou, 510260, China.

<sup>3</sup>Department of Minimally Invasive Interventional Radiology, Sun Yat-sen University Cancer Centre, Guangzhou, Guangdong 510060, China.

<sup>4</sup>Department of Medical Ultrasonics, Institute of Diagnostic and Interventional Ultrasound, The First Affiliated Hospital of Sun Yat-sen University, Guangzhou, 510060, China.

<sup>5</sup>Department of Liver Surgery, The First Affiliated Hospital of Sun Yat-sen University, Guangzhou, Guangdong Province, 510060, China.

<sup>6</sup>Department of Liver Surgery, Sun Yat-sen University Cancer Centre, Guangzhou, Guangdong 510060, China.

<sup>7</sup>Department of Interventional Ultrasound, Chinese PLA General Hospital, 28 Fuxing Road, Beijing 100853, China.

**# Correspondence authors:**

Ping Liang: Department of Interventional Ultrasound, Chinese PLA General Hospital, 28 Fuxing Road, Beijing 100853, China. Email: [pingliang@plageneralhospital.com](mailto:pingliang@plageneralhospital.com); Tel: +86-010-68182255;

Xian-Hai Mao: Department of Hepatobiliary Surgery, Hunan Provincial People's Hospital (The First Affiliated Hospital of Hunan Normal University) Changsha, Hunan province, 410002, China. Email: [maoxh2022@hunnu.edu.cn](mailto:maoxh2022@hunnu.edu.cn); Tel: +86-0731-83928056;

Qun-Fang Zhou: Department of Interventional Ultrasound, Chinese PLA General Hospital, 28 Fuxing Road, Beijing 100853, China. Email: [zouqunfang@163.com](mailto:zouqunfang@163.com); Tel: +86-010-66887329;

**Supplementary figure 1.** Distribution of the propensity score after matching.

**Supplementary figure 2.** Standardised differences in mean or proportion of variables before and after propensity score matching.

**Supplementary table 1.** Univariate analysis of prognostic factors on overall survival (OS) and progression-free survival (PFS) in patients with intermediate-stage recurrent hepatocellular carcinoma (RHCC) after propensity score matching (PSM).

**Supplementary table 2.** Treatment-related adverse events of patients in transarterial chemoembolization (TACE)-sorafenib and TACE-sorafenib + radiofrequency ablation (RFA) groups.

Supplementary figure 1. Distribution of the propensity score after matching.

### Distribution of Propensity Scores

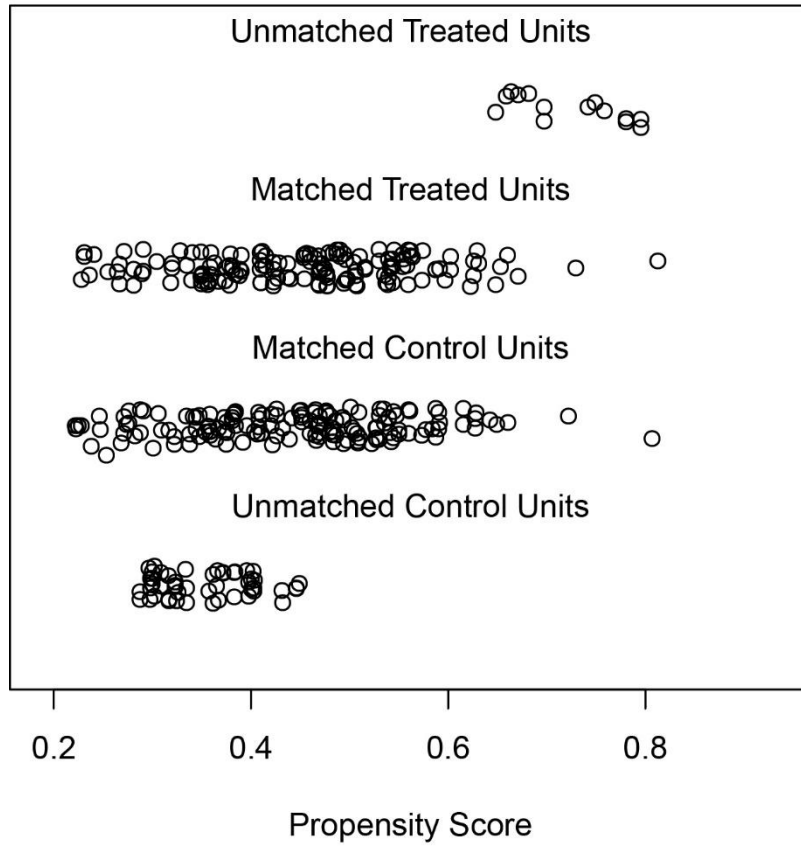

**Supplementary figure 2.** Standardised differences in mean or proportion of variables before and after propensity score matching.

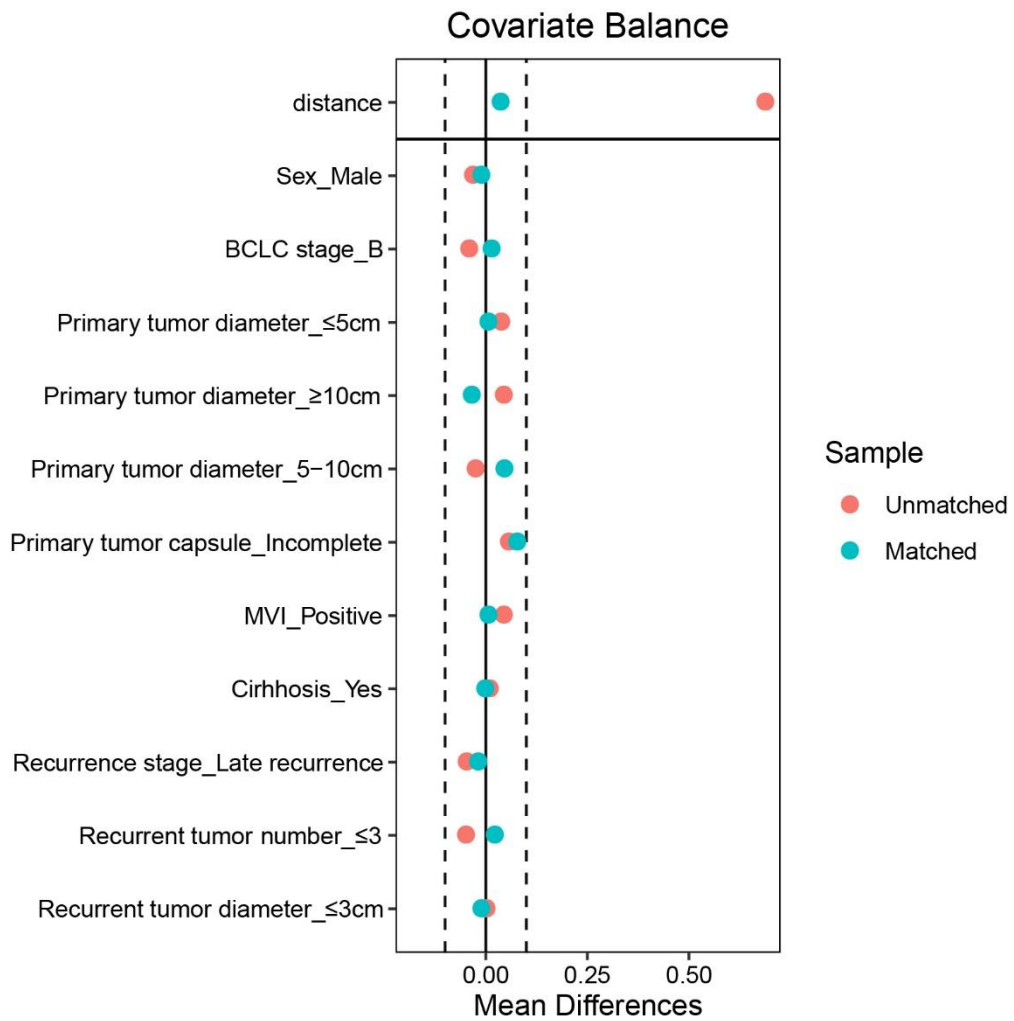

**Supplementary table 1.** Univariate analysis of prognostic factors on overall survival (OS) and progression-free survival (PFS) in patients with intermediate-stage recurrent hepatocellular carcinoma (RHCC) after propensity score matching (PSM).

| Variable                              | Comparison                                | Overall survival |                | Progression-free survival |                |
|---------------------------------------|-------------------------------------------|------------------|----------------|---------------------------|----------------|
|                                       |                                           | HR (95% CI)      | <i>P</i> value | HR (95% CI)               | <i>P</i> value |
| <b>Recurrent stage data</b>           |                                           |                  |                |                           |                |
| Age level, years                      | <60 vs. ≥60                               | 0.93 (0.65-1.33) | 0.708          | 0.97 (0.72-1.29)          | 0.814          |
| Sex                                   | Female vs. Male                           | 0.73 (0.46-1.16) | 0.181          | 0.74 (0.51-1.08)          | 0.116          |
| ALBI grade                            | Grade 1 vs. Grade 2                       | 1.15 (0.86-1.54) | 0.350          | 0.96 (0.75-1.23)          | 0.729          |
| Anti-virus                            | Yes vs. No                                | 0.86 (0.64-1.16) | 0.327          | 0.90 (0.70-1.17)          | 0.444          |
| AFP level, ng/ml                      | <400 vs. ≥400                             | 1.24 (0.93-1.65) | 0.145          | 1.43 (1.12-1.82)          | 0.004          |
| Tumour size, cm                       | ≤3 vs. >3                                 | 1.77 (1.32-2.37) | <0.001         | 1.16 (1.27-2.05)          | <0.001         |
| Tumour number                         | ≤3 vs. >3                                 | 2.42 (1.75-3.34) | <0.001         | 2.68 (2.06-3.49)          | <0.001         |
| Recurrent stage                       | Late vs. Early                            | 2.53 (1.84-3.47) | <0.001         | 2.06 (1.61-2.65)          | <0.001         |
| Types of treatment                    | TACE-sorafenib +RFA vs.<br>TACE-sorafenib | 1.93 (1.44-2.60) | <0.001         | 2.09 (1.64-2.66)          | <0.001         |
| <b>Initial hepatectomy stage data</b> |                                           |                  |                |                           |                |
| Tumour size, cm                       | ≤5                                        | Reference        |                |                           |                |
|                                       | >5, <10                                   | 1.47 (0.99-2.24) | 0.058          | 0.99 (0.72-1.36)          | 0.960          |
|                                       | ≥10                                       | 2.00 (1.27-3.16) | 0.003          | 1.40 (0.98-2.00)          | 0.063          |
| BCLC stage                            | A vs. B                                   | 1.93 (1.44-2.58) | <0.001         | 1.62 (1.27-2.07)          | <0.001         |
| MVI                                   | Negative vs. Positive                     | 1.81 (1.31-2.50) | <0.001         | 1.67 (1.29-2.16)          | <0.001         |
| Resection margin, cm                  | >1 vs. ≤1                                 | 1.45 (1.09-1.93) | 0.010          | 1.25 (0.99-1.58)          | 0.063          |
| Tumour differentiation                | I-II vs. III-IV                           | 1.02 (0.75-1.39) | 0.895          | 1.15 (0.89-1.49)          | 0.279          |
| Tumour capsule                        | Complete vs. Incomplete                   | 0.99 (0.74-1.34) | 0.979          | 1.01 (0.78-1.29)          | 0.960          |
| Cirrhosis                             | No vs. Yes                                | 0.97 (0.73-1.29) | 0.817          | 1.10 (0.87-1.39)          | 0.434          |

AFP, alpha-fetoprotein; ALBI, albumin-bilirubin; BCLC, Barcelona Clinic Liver Cancer; CI, confidence interval; HR, hazard ratio; MVI, microvascular invasion; RFA, radiofrequency ablation; TACE, transarterial chemoembolization;

**Supplementary table 2.** Treatment-related adverse events of patients in transarterial chemoembolization (TACE)-sorafenib and TACE-sorafenib + radiofrequency ablation (RFA) groups.

| <b>Adverse Event</b>           | <b>TACE-sorafenib<br/>(n=164)</b> | <b>TACE-sorafenib +RFA<br/>(n=199)</b> | <b><i>P</i><br/>value</b> |
|--------------------------------|-----------------------------------|----------------------------------------|---------------------------|
| <b>Hand-foot skin reaction</b> |                                   |                                        | 0.748                     |
| Grade 1–2                      | 55 (33.5)                         | 57 (28.6)                              |                           |
| Grade 3–4                      | 3 (1.8)                           | 4 (2.0)                                |                           |
| <b>Hypertension</b>            |                                   |                                        | 0.889                     |
| Grade 1–2                      | 56 (34.1)                         | 62 (31.2)                              |                           |
| Grade 3–4                      | 4 (2.4)                           | 4 (2.0)                                |                           |
| <b>Rash or desquamation</b>    |                                   |                                        | 0.532                     |
| Grade 1–2                      | 26 (15.9)                         | 28 (14.1)                              |                           |
| Grade 3–4                      | 2 (1.2)                           | 1 (0.5)                                |                           |
| <b>Diarrhea</b>                |                                   |                                        | 0.371                     |
| Grade 1–2                      | 22 (13.4)                         | 27 (13.6)                              |                           |
| Grade 3–4                      | 0 (0)                             | 1 (0.5)                                |                           |
| <b>Alopecia</b>                |                                   |                                        | 0.291                     |
| Grade 1–2                      | 21 (12.8)                         | 24 (12.1)                              |                           |
| Grade 3–4                      | 1 (0.6)                           | 0 (0)                                  |                           |
| <b>Fatigue</b>                 |                                   |                                        | 0.358                     |
| Grade 1–2                      | 30 (18.2)                         | 34 (17.1)                              |                           |
| Grade 3–4                      | 0 (0)                             | 1 (0.5)                                |                           |
| <b>Decreased appetite</b>      |                                   |                                        | 0.436                     |
| Grade 1–2                      | 32 (19.5)                         | 41 (20.6)                              |                           |
| Grade 3–4                      | 2 (1.2)                           | 1 (0.5)                                |                           |
| <b>Voice change</b>            |                                   |                                        | 0.347                     |
| Grade 1–2                      | 19 (11.6)                         | 21 (10.6)                              |                           |
| Grade 3–4                      | 0 (0)                             | 1 (0.5)                                |                           |
| <b>Oral mucositis</b>          |                                   |                                        | 0.308                     |
| Grade 1–2                      | 12 (7.3)                          | 13 (6.5)                               |                           |
| Grade 3–4                      | 1 (0.6)                           | 0 (0)                                  |                           |
| <b>Increased ALT/AST</b>       |                                   |                                        | 0.609                     |
| Grade 1–2                      | 18 (11.0)                         | 19 (9.5)                               |                           |
| Grade 3–4                      | 1 (0.6)                           | 2 (1.0)                                |                           |
| <b>Pleural effusion</b>        |                                   |                                        | 0.772                     |
| Grade 1–2                      | 35 (21.3)                         | 40 (20.1)                              |                           |
| Grade 3–4                      | 2 (1.2)                           | 3 (1.5)                                |                           |
| <b>Haemorrhage</b>             |                                   |                                        | 0.505                     |
| Grade 1–2                      | 1 (0.5)                           | 2 (1.0)                                |                           |
| Grade 3–4                      | 0 (0)                             | 1 (0.5)                                |                           |
| <b>Fever</b>                   |                                   |                                        | 0.572                     |
| Grade 1–2                      | 81 (49.3)                         | 94 (47.2)                              |                           |
| Grade 3–4                      | 4 (2.4)                           | 3 (1.5)                                |                           |

RFA, radiofrequency ablation; TACE, transarterial chemoembolization; ALT, alanine aminotransferase;  
AST, aspartate aminotransferase;
